# Supplementary material for: Differentially methylated and expressed genes in familial type 1 diabetes
Source: Sci Rep. 2022 Jun 30;12:11045. doi: 10.1038/s41598-022-15304-5 (PMC9247163; doi:10.1038/s41598-022-15304-5)
Supplement: Supplementary file 6 — Supplementary Information 6. [file 41598_2022_15304_MOESM6_ESM.xlsx]

## Sheet: Single_BP
Supplemental Table S1. Differential methylation events identified across all three T1D families.
chr	start	end	strand	pvalue	qvalue	meth.diff	meth.direction	dist.to.feature	feature.gene	feature.name	feature.fullname	feature.strand	CpGi	shores	prom	exon	intron
chr1	566879	566879	+	2.05313e-36	1.44059e-31	34.8441	Hyper	1187	MIR12136	NR_162149.1	microRNA 12136	-	0	0	0	0	0
chr3	40284731	40284731	+	1.67023e-30	5.85965e-26	-43.785	Hypo	66459	EIF1B-AS1	NR_033965.1	EIF1B antisense RNA 1	-	0	0	0	0	1
chr5	79946750	79946750	+	7.07368e-25	9.92661e-21	31.1278	Hyper	78	MTRNR2L2	NM_001190470.2	MT-RNR2 like 2	-	0	0	1	1	1
chr1	159821052	159821052	+	1.08469e-21	9.45905e-18	-36.8486	Hypo	3776	SNHG28	NR_147125.1	small nucleolar RNA host gene 28	-	0	0	0	0	1
chr13	24993398	24993398	+	1.02493e-20	7.19154e-17	33.8836	Hyper	87812	LINC00566	NR_131903.1	long intergenic non-protein coding RNA 566	+	0	0	0	0	0
chr8	95544723	95544723	+	1.53177e-19	9.77074e-16	-38.5539	Hypo	20975	VIRMA	NM_015496.5	vir like m6A methyltransferase associated	-	0	0	0	0	1
chr3	156880883	156880883	+	2.62563e-19	1.53524e-15	-30.1144	Hypo	-2335	CCNL1	NM_020307.3	cyclin L1	-	0	0	0	0	0
chr11	102028829	102028829	+	2.86852e-17	1.25795e-13	-33.4467	Hypo	45652	YAP1	NM_001195045.2	Yes1 associated transcriptional regulator	+	0	0	0	0	1
chr22	49564290	49564290	+	2.152e-15	7.54985e-12	-30.8628	Hypo	301710	LINC01310	NR_038944.1	long intergenic non-protein coding RNA 1310	+	1	0	0	0	0
chr3	72566804	72566804	+	2.7714e-15	9.25989e-12	31.7366	Hyper	-71031	RYBP	NM_012234.6	RING1 and YY1 binding protein	-	0	0	0	0	0
chr8	119080372	119080372	+	6.0424e-15	1.92714e-11	-29.1213	Hypo	43687	EXT1	NM_000127.2	exostosin glycosyltransferase 1	-	0	0	0	0	1
chr3	112927486	112927486	+	2.95546e-14	8.64051e-11	-36.1791	Hypo	-2918	BOC	NM_033254.4	BOC cell adhesion associated, oncogene regulated	+	0	0	0	0	0
chr7	130636492	130636492	+	6.39007e-14	1.66061e-10	29.4799	Hyper	38271	LINC00513	NR_109780.1	long intergenic non-protein coding RNA 513	+	0	0	0	0	1
chr16	8882837	8882837	+	1.08199e-13	2.61788e-10	28.4905	Hyper	8660	TMEM186	NM_015421.4	transmembrane protein 186	-	0	0	0	0	0
chr9	90613914	90613914	+	1.12345e-13	2.62759e-10	27.3077	Hyper	-24220	CDK20	NM_001170640.1	cyclin dependent kinase 20	-	0	0	0	0	0
chr16	31676140	31676140	+	1.31859e-13	2.93416e-10	26.4723	Hyper	-35794	CLUHP3	NR_024034.1	clustered mitochondria homolog pseudogene 3	+	0	0	0	0	0
chr11	71114062	71114062	+	1.54606e-13	3.28729e-10	-29.7382	Hypo	20339	ACTE1P	NR_038862.1	actin epsilon 1, pseudogene	-	0	0	0	0	0
chr8	1870722	1870722	+	3.00885e-13	6.20936e-10	-26.0006	Hypo	-48841	KBTBD11-OT1	NR_126346.1	KBTBD11 overlapping transcript 1	+	0	0	0	0	1
chr6	109692188	109692188	+	3.33575e-13	6.68731e-10	-30.0699	Hypo	10755	CD164	NM_001346500.2	CD164 molecule	-	0	0	0	0	1
chr11	71421344	71421344	+	8.72853e-13	1.70124e-09	-29.3102	Hypo	-77213	FAM86C1P	NM_152563.2	family with sequence similarity 86 member C1, pseudogene	+	0	0	0	0	0
chr4	190307301	190307301	+	1.02827e-12	1.89867e-09	-27.2411	Hypo	-273459	LINC01262	NR_121679.1	long intergenic non-protein coding RNA 1262	+	0	0	0	0	0
chr7	31821768	31821768	+	1.3343e-12	2.40057e-09	26.8133	Hyper	94941	PPP1R17	NM_006658.5	protein phosphatase 1 regulatory subunit 17	+	0	0	0	0	1
chr8	95558694	95558694	+	3.44528e-12	5.62188e-09	29.4966	Hyper	7004	VIRMA	NM_015496.5	vir like m6A methyltransferase associated	-	0	0	0	0	1
chr3	98504779	98504779	+	4.23483e-12	6.70528e-09	29.9522	Hyper	22630	ST3GAL6	NM_001323368.1	ST3 beta-galactoside alpha-2,3-sialyltransferase 6	+	0	0	0	0	1
chr7	8171773	8171773	+	5.67761e-12	8.6603e-09	29.1667	Hyper	130025	ICA1	NM_001350820.2	islet cell autoantigen 1	-	0	0	0	0	1
chr3	197019934	197019934	+	9.08384e-12	1.30077e-08	29.4781	Hyper	886	MIR4797	NR_039960.1	microRNA 4797	-	0	0	1	0	1
chr5	140789268	140789268	+	1.71288e-11	2.40372e-08	-26.4515	Hypo	1500	PCDHGB6	NM_018926.2	protocadherin gamma subfamily B, 6	+	1	0	0	1	1
chr19	21769757	21769757	+	2.8968e-11	3.83502e-08	26.2906	Hyper	-62713	LOC400682	NR_144514.1	zinc finger protein 100-like	+	1	0	0	0	0
chr16	788035	788035	+	3.51124e-11	4.39945e-08	-29.0957	Hypo	2963	CIAO3	NM_001304799.2	cytosolic iron-sulfur assembly component 3	-	0	1	0	0	1
chr5	141914343	141914343	+	3.45103e-11	4.39945e-08	-25.1297	Hypo	86557	FGF1	NM_001144892.3	fibroblast growth factor 1	-	0	0	0	0	0
chr5	106599492	106599492	+	5.33154e-11	6.34054e-08	-29.7259	Hypo	-252778	LINC01950	NR_104671.1	long intergenic non-protein coding RNA 1950	-	0	0	0	0	0
chr19	56510965	56510965	+	6.32287e-11	7.20757e-08	-25.7308	Hypo	-127	NLRP5	NM_153447.4	NLR family pyrin domain containing 5	+	0	0	1	0	0
chr7	62720771	62720771	+	8.36007e-11	9.31097e-08	-28.4325	Hypo	43664	ZNF733P	NR_003952.1	zinc finger protein 733, pseudogene	-	0	0	0	0	0
chr2	73465970	73465970	+	1.04095e-10	1.12368e-07	-28.1573	Hypo	4536	CCT7	NM_006429.4	chaperonin containing TCP1 subunit 7	+	0	0	0	0	1
chr17	13837050	13837050	+	2.23561e-10	2.11978e-07	25.9089	Hyper	-90765	CDRT15P1	NR_003261.1	CDRT15 pseudogene 1	+	0	0	0	0	0
chr2	130763500	130763500	+	2.27548e-10	2.12881e-07	-28.4164	Hypo	-25456	RAB6C-AS1	NR_036537.1	RAB6C antisense RNA 1	-	1	0	0	0	0
chr17	74350980	74350980	+	2.85466e-10	2.60129e-07	-30.7789	Hypo	-702	PRPSAP1	NM_001366236.1	phosphoribosyl pyrophosphate synthetase associated protein 1	-	0	1	1	0	0
chr7	34944777	34944777	+	3.01087e-10	2.70846e-07	-26.7404	Hypo	35670	MIR548N	NR_031666.1	microRNA 548n	-	0	0	0	0	0
chr11	5012592	5012592	+	4.33587e-10	3.53756e-07	26.7015	Hyper	3173	MMP26	NM_021801.4	matrix metallopeptidase 26	+	0	0	0	0	1
chr10	124670259	124670259	+	4.64441e-10	3.74573e-07	-25.5342	Hypo	135	FAM24A	NM_001029888.3	family with sequence similarity 24 member A	+	0	0	1	1	0
chr10	29580742	29580742	+	5.09488e-10	3.97207e-07	-28.251	Hypo	2745	LYZL1	NM_032517.6	lysozyme like 1	+	0	0	0	0	1
chr5	153136065	153136065	+	5.17475e-10	3.99001e-07	-28.0209	Hypo	142483	LINC01861	NR_146729.1	long intergenic non-protein coding RNA 1861	-	0	0	0	0	1
chr7	8171803	8171803	+	1.31628e-09	8.726e-07	28.9712	Hyper	129995	ICA1	NM_001350820.2	islet cell autoantigen 1	-	0	0	0	0	1
chr9	28148020	28148020	+	1.88433e-09	1.17005e-06	-26.5215	Hypo	571284	LINGO2	NM_152570.3	leucine rich repeat and Ig domain containing 2	-	0	0	0	0	1
chr16	89300215	89300215	+	1.94462e-09	1.1969e-06	-25.8821	Hypo	16106	ZNF778	NR_037705.2	zinc finger protein 778	+	0	1	0	1	0
chr6	4782565	4782565	+	2.18985e-09	1.28642e-06	-30.3168	Hypo	5929	CDYL	NM_004824.4	chromodomain Y like	+	0	0	0	0	1
chr7	134902960	134902960	+	2.39361e-09	1.37664e-06	-29.1667	Hypo	-6683	WDR91	NR_156130.2	WD repeat domain 91	-	0	0	0	0	0
chr5	120389081	120389081	+	3.44097e-09	1.93151e-06	27.9745	Hyper	-269164	LOC102467226	NR_104999.1	uncharacterized LOC102467226	+	0	0	0	0	0
chr5	6030096	6030096	+	4.39354e-09	2.37135e-06	25.0821	Hyper	307310	LINC02145	NR_028351.1	long intergenic non-protein coding RNA 2145	-	0	0	0	0	0
chr2	145506107	145506107	+	5.72818e-09	3.04487e-06	28.22	Hyper	80575	TEX41	NR_033870.2	testis expressed 41	+	0	0	0	0	1
chr19	10027408	10027408	+	1.01482e-08	4.84392e-06	-27.6088	Hypo	-2932	OLFM2	NM_001304347.2	olfactomedin 2	-	0	1	0	0	1
chr7	106513011	106513011	+	1.09718e-08	5.20166e-06	-28.1451	Hypo	7089	PIK3CG	NM_002649.3	phosphatidylinositol-4,5-bisphosphate 3-kinase catalytic subunit gamma	+	0	0	0	1	0
chr18	3412523	3412523	+	1.75214e-08	7.76009e-06	26.4761	Hyper	-331	TGIF1	NM_001278686.1	TGFB induced factor homeobox 1	+	0	0	1	0	1
chr3	11610728	11610728	+	2.23434e-08	9.44423e-06	-26.1672	Hypo	-457	VGLL4	NM_001128221.3	vestigial like family member 4	-	0	1	1	0	1
chr3	134099216	134099216	+	2.87333e-08	1.17215e-05	25.5898	Hyper	-4958	AMOTL2	NM_001278683.1	angiomotin like 2	-	0	0	0	0	0
chr7	158249233	158249233	+	3.31731e-08	1.29312e-05	25.9459	Hyper	76273	MIR595	NR_030325.1	microRNA 595	-	1	0	0	0	1
chr14	50549167	50549167	+	3.43576e-08	1.31734e-05	25.0176	Hyper	22595	LINC01599	NR_131171.1	long intergenic non-protein coding RNA 1599	-	0	0	0	0	1
chr14	95851440	95851440	+	5.1532e-08	1.82615e-05	-26.4881	Hypo	55521	LINC02292	NR_110127.1	long intergenic non-protein coding RNA 2292	+	0	0	0	0	0
chr6	11525995	11525995	+	5.95534e-08	2.03289e-05	-25.6644	Hypo	-11987	TMEM170B	NM_001100829.3	transmembrane protein 170B	+	0	0	0	0	0
chr19	5962749	5962749	+	6.31578e-08	2.12035e-05	25.8815	Hyper	15403	RANBP3	NM_007322.3	RAN binding protein 3	-	0	0	0	0	1
chr9	100070100	100070100	+	1.15081e-07	3.33668e-05	-25.8813	Hypo	161	CCDC180	NM_020893.4	coiled-coil domain containing 180	+	1	0	1	0	1
chr19	58716004	58716004	+	6.55536e-07	0.000123646	-25.7545	Hypo	21578	ZNF274	NM_133502.3	zinc finger protein 274	+	1	0	0	0	1
chr18	48138129	48138129	+	6.7358e-07	0.000126033	25.6131	Hyper	51674	MAPK4	NM_002747.4	mitogen-activated protein kinase 4	+	0	0	0	0	1

## Sheet: Tiles
Supplemental Table S1. Differential methylation events identified across all three T1D families.
chr	start	end	strand	pvalue	qvalue	meth.diff	dist.to.feature	feature.gene	feature.name	feature.full	feature.strand	CpGi	shores	prom	exon	intron
chr2	153278001	153279000	*	2.27042e-33	7.08865e-31	34.9176	86315	FMNL2	NM_052905.4	formin like 2	+	0	0	0	0	1
chr3	40284001	40285000	*	1.13502e-40	6.64447e-38	-42.4585	66190	EIF1B-AS1	NR_033965.1	EIF1B antisense RNA 1	-	0	0	0	0	1
chr3	197019001	197020000	*	4.43227e-18	3.03768e-16	31.2237	820	MIR4797	NR_039960.1	microRNA 4797	-	0	0	1	0	1
chr4	190307001	190308000	*	1.38018e-17	8.86792e-16	-27.5208	-272760	LINC01262	NR_121679.1	long intergenic non-protein coding RNA 1262	+	0	0	0	0	0
chr5	106599001	106600000	*	4.33835e-16	2.28003e-14	-25.9878	-252287	LINC01950	NR_104671.1	long intergenic non-protein coding RNA 1950	-	0	0	0	0	0
chr5	120389001	120390000	*	6.99154e-28	1.37065e-25	30.1556	-268245	LOC102467226	NR_104999.1	uncharacterized LOC102467226	+	0	0	0	0	0
chr6	4782001	4783000	*	2.0575e-12	5.84383e-11	-27.4448	5365	CDYL	NM_004824.4	chromodomain Y like	+	0	0	0	0	1
chr6	109692001	109693000	*	7.44838e-17	4.40315e-15	-30.0261	9943	CD164	NM_001346500.2	CD164 molecule	-	0	0	0	0	1
chr7	8171001	8172000	*	3.06523e-26	5.25193e-24	28.0633	129798	ICA1	NM_001350820.2	islet cell autoantigen 1	-	0	0	0	0	1
chr7	48464001	48465000	*	6.0074e-14	2.20565e-12	-25.2164	252948	ABCA13	NM_152701.5	ATP binding cassette subfamily A member 13	+	0	0	0	0	1
chr7	134902001	134903000	*	2.85266e-13	9.35703e-12	-29.7492	-5724	WDR91	NR_156130.2	WD repeat domain 91	-	0	0	0	0	0
chr7	151982001	151983000	*	9.66006e-12	2.4236e-10	-28.5869	150089	KMT2C	NM_170606.3	lysine methyltransferase 2C	-	0	0	0	0	1
chr8	817001	818000	*	3.79376e-66	7.6145e-63	-26.1277	15227	LOC105377777	NR_160729.1	uncharacterized LOC105377777	-	0	0	0	0	1
chr8	29937001	29938000	*	1.19505e-13	4.16285e-12	25.4329	2581	SARAF	NM_016127.6	store-operated calcium entry associated regulatory factor	-	0	0	0	0	1
chr8	33062001	33063000	*	4.06946e-11	9.1364e-10	-25.544	267665	FUT10	NM_032664.3	fucosyltransferase 10	-	0	0	0	0	0
chr8	95558001	95559000	*	5.90393e-20	4.99693e-18	32.2699	6698	VIRMA	NM_015496.5	vir like m6A methyltransferase associated	-	0	0	0	0	1
chr8	138762001	138763000	*	3.55267e-21	3.41878e-19	28.6379	332789	LOC401478	NR_161374.1	uncharacterized LOC401478	-	0	0	0	0	0
chr9	34664001	34665000	*	8.21746e-77	3.14873e-73	-34.2774	1043	LOC730098	NM_001320038.2	uncharacterized LOC730098	-	1	1	0	1	0
chr11	5012001	5013000	*	1.29704e-12	3.82035e-11	25.1773	2582	MMP26	NM_021801.4	matrix metallopeptidase 26	+	0	0	0	1	1
chr11	117254001	117255000	*	1.24346e-27	2.41526e-25	-34.4381	55433	CEP164	NM_014956.5	centrosomal protein 164	+	0	0	0	0	1
chr12	92988001	92989000	*	7.00663e-14	2.53934e-12	25.1655	-107619	PLEKHG7	NM_001037671.3	pleckstrin homology and RhoGEF domain containing G7	+	0	0	0	0	0
chr12	102270001	102271000	*	1.89017e-57	2.48967e-54	30.653	-358	DRAM1	NM_018370.3	DNA damage regulated autophagy modulator 1	+	1	1	1	0	0
chr14	91752001	91753000	*	2.43875e-34	8.42556e-32	-32.0746	-31778	GPR68	NM_003485.3	G protein-coupled receptor 68	-	0	0	0	0	1
chr14	95851001	95852000	*	1.05849e-13	3.72099e-12	-27.5937	55082	LINC02292	NR_110127.1	long intergenic non-protein coding RNA 2292	+	0	0	0	0	0
chr16	49943001	49944000	*	6.65455e-14	2.42634e-12	-28.029	-51172	ZNF423	NM_001271620.2	zinc finger protein 423	-	0	0	0	0	0
chr17	9264001	9265000	*	2.35686e-13	7.84056e-12	-25.9919	-181567	LOC101928266	NR_110828.1	uncharacterized LOC101928266	-	0	0	0	0	1
chr17	13837001	13838000	*	2.56972e-32	7.46978e-30	41.9037	-89815	CDRT15P1	NR_003261.1	CDRT15 pseudogene 1	+	0	0	0	0	0
chr17	20947001	20948000	*	1.20541e-70	3.17546e-67	35.3455	-678	USP22	NM_015276.2	ubiquitin specific peptidase 22	-	1	1	1	0	0
chr17	40119001	40120000	*	1.92342e-52	2.02678e-49	26.0754	0	CNP	NM_001330216.2	2',3'-cyclic nucleotide 3' phosphodiesterase	+	1	1	1	1	1
chr19	23257001	23258000	*	5.73318e-19	4.30748e-17	25.9727	-12935	LINC01858	NR_110745.1	long intergenic non-protein coding RNA 1858	-	1	1	0	0	0
chr19	51672001	51673000	*	6.36349e-47	5.15802e-44	-27.881	1418	SIGLEC17P	NR_047529.2	sialic acid binding Ig like lectin 17, pseudogene	+	0	0	0	0	1
chr20	29525001	29526000	*	1.04407e-69	2.58863e-66	-26.3592	-3789	LINC01597	NR_145432.2	long intergenic non-protein coding RNA 1597	-	0	0	0	0	0
chr22	33119001	33120000	*	1.38272e-19	1.11435e-17	-27.539	-76802	TIMP3	NM_000362.4	TIMP metallopeptidase inhibitor 3	+	0	0	0	0	1
chr22	46645001	46646000	*	1.60096e-112	2.24931e-108	-26.3154	191	CDPF1	NM_207327.5	cysteine rich DPF motif domain containing 1	-	1	1	1	0	1

## Sheet: Truseq
Supplemental Table S1. Differential methylation events identified across all three T1D families.
chr	start	end	strand	pvalue	qvalue	meth.diff	dist.to.feature	feature.gene	feature.name	feature.full	feature.strand	CpGi	shores	prom	exon	intron
chr3	40284625	40284834	*	1.28107e-41	8.59034e-39	-42.7182	66356	EIF1B-AS1	NR_033965.1	EIF1B antisense RNA 1	-	0	0	0	0	1
chr3	112927357	112927616	*	9.15602e-17	5.59906e-15	-25.357	-2788	BOC	NM_033254.4	BOC cell adhesion associated, oncogene regulated	+	0	0	0	0	0
chr3	197019775	197020092	*	2.9244e-18	2.16642e-16	31.1512	728	MIR4797	NR_039960.1	microRNA 4797	-	0	0	1	0	1
chr4	190307236	190307409	*	1.05439e-18	8.28441e-17	-28.2256	-273351	LINC01262	NR_121679.1	long intergenic non-protein coding RNA 1262	+	0	0	0	0	0
chr5	106599357	106599620	*	4.82433e-16	2.60236e-14	-25.6953	-252643	LINC01950	NR_104671.1	long intergenic non-protein coding RNA 1950	-	0	0	0	0	0
chr5	120388958	120389191	*	1.69764e-29	4.78445e-27	30.714	-269054	LOC102467226	NR_104999.1	uncharacterized LOC102467226	+	0	0	0	0	0
chr6	4782484	4782683	*	1.45462e-11	3.56932e-10	-26.6417	5848	CDYL	NM_004824.4	chromodomain Y like	+	0	0	0	0	1
chr6	109692036	109692305	*	4.07132e-17	2.64788e-15	-30.0934	10638	CD164	NM_001346500.2	CD164 molecule	-	0	0	0	0	1
chr7	8171680	8171904	*	1.69385e-24	2.82738e-22	26.8503	129894	ICA1	NM_001350820.2	islet cell autoantigen 1	-	0	0	0	0	1
chr7	48464527	48464805	*	8.44817e-15	3.70429e-13	-25.686	253474	ABCA13	NM_152701.5	ATP binding cassette subfamily A member 13	+	0	0	0	0	1
chr8	816872	817253	*	3.05988e-71	1.08187e-67	-25.523	15974	LOC105377777	NR_160729.1	uncharacterized LOC105377777	-	0	0	0	0	1
chr8	29937320	29937602	*	1.11199e-13	3.97499e-12	25.1864	2979	SARAF	NM_016127.6	store-operated calcium entry associated regulatory factor	-	0	0	0	0	1
chr8	33062053	33062289	*	1.69553e-11	4.11632e-10	-25.7955	268376	FUT10	NM_032664.3	fucosyltransferase 10	-	0	0	0	0	0
chr8	95558547	95558867	*	9.9034e-21	9.85083e-19	32.653	6831	VIRMA	NM_015496.5	vir like m6A methyltransferase associated	-	0	0	0	0	1
chr11	5012435	5012758	*	9.12403e-14	3.31951e-12	26.1337	3016	MMP26	NM_021801.4	matrix metallopeptidase 26	+	0	0	0	1	1
chr11	45307890	45308239	*	2.35186e-41	1.55033e-38	38.6902	0	SYT13	NM_020826.3	synaptotagmin 13	-	1	1	1	1	0
chr11	117254036	117254255	*	3.05068e-27	7.23466e-25	-33.8889	55468	CEP164	NM_014956.5	centrosomal protein 164	+	0	0	0	0	1
chr14	95851314	95851582	*	6.73695e-14	2.50669e-12	-27.4874	55395	LINC02292	NR_110127.1	long intergenic non-protein coding RNA 2292	+	0	0	0	0	0
chr16	49943701	49943920	*	6.48306e-14	2.41747e-12	-27.7083	-51872	ZNF423	NM_001271620.2	zinc finger protein 423	-	0	0	0	0	0
chr17	9264565	9264886	*	1.05736e-13	3.79366e-12	-26.0777	-182131	LOC101928266	NR_110828.1	uncharacterized LOC101928266	-	0	0	0	0	1
chr17	13836903	13837291	*	1.54851e-27	3.74071e-25	33.8214	-90524	CDRT15P1	NR_003261.1	CDRT15 pseudogene 1	+	0	0	0	0	0
chr19	51672123	51672944	*	7.88962e-48	6.70588e-45	-27.9106	1540	SIGLEC17P	NR_047529.2	sialic acid binding Ig like lectin 17, pseudogene	+	0	0	0	0	1
chr19	58094357	58094946	*	8.03283e-47	6.24833e-44	-25.7463	-567	ZIK1	NM_001321147.2	zinc finger protein interacting with K protein 1	+	1	1	1	0	0
chr20	29525141	29525615	*	9.54968e-70	3.09509e-66	-26.1575	-3929	LINC01597	NR_145432.2	long intergenic non-protein coding RNA 1597	-	0	0	0	0	0
chr22	33119131	33119362	*	1.81123e-23	2.61871e-21	-28.9897	-77440	TIMP3	NM_000362.4	TIMP metallopeptidase inhibitor 3	+	0	0	0	0	1
