# Supplementary material for: Differentially methylated and expressed genes in familial type 1 diabetes
Source: Sci Rep. 2022 Jun 30;12:11045. doi: 10.1038/s41598-022-15304-5 (PMC9247163; doi:10.1038/s41598-022-15304-5)
Supplement: Supplementary file 8 — Supplementary Information 8. [file 41598_2022_15304_MOESM8_ESM.xlsx]

## Sheet: TableS3
Supplemental Table S3. Differentially expressed genes of published T1D gene expression data.
Accession ID	Description	Tissue	Comparisons	Differentially expressed genes
E-MEXP-1140	Transcription profiling of human pancreas from patients with type 1 diabetes (recent onset, clinical onset and longstanding)	Pancreas	Control vs T1D recent onset	645
			Control vs T1D clinical onset	7731
			Control vs T1D l longstanding	1
GSE72492	Gene expression in the pancreas of healthy control, auto-antibody positive, and type 1 diabetic subjects	Pancreas	Control vs T1D	796
GSE9006	Transcription profiling of human peripheral blood mononuclear cells from diabetic children (newly diagnosed, one- and four-month follow-up)	Blood	Control vs T1D recent onset	139
			Control vs T1D 1 month after onset	5
			Control vs T1D 4 month after onset	1417
GSE44314	Gene expression fulminant type 1 diabetes vs classical type 1A diabetes vs healthy controls	Blood	Control vs T1D	64
GSE29142	Transcriptome profile of peripheral blood mononuclear cells in patients with type I diabetes and their first-grade relatives	Blood	Control vs T1D	11
GSE43488	Genome-wide expression kinetics of children with type 1 diabetes associated autoantibodies or progression towards clinical T1D, compared to healthy matched controls	Blood	Control vs T1D	627
GSE33440	Peripheral blood monocyte gene expression in recent-onset type 1 diabetes	Blood	Control vs T1D	3765
GSE55098	Expression data from peripheral blood mononuclear cell in patients with type 1 diabetes compared with normal controls	Blood	Control vs T1D	12
